# Supplementary material
Source: ML conference proceedings conference paper supplement (https://www.ecva.net/papers/eccv_2020/papers_ECCV/html/123720698_ECCV_2020_paper.php)
Supplement: Supplementary file 2 [file 123720698-supp.zip]

Archive with 27 entries (24 files):
- Supplementary_Materials/Drums_15_15_Sample_Results.mp4
- Supplementary_Materials/M3SO_30_30_Sample_Results.mp4
- Supplementary_Materials/M3SO_NB_5_15_Sample_Results.mp4
- Supplementary_Materials/Painting_15_15_Sample_Results.mp4
- Supplementary_Materials/Sample_AudioSet_Drums.mp4
- Supplementary_Materials/Sample_MovingMNIST.avi
- Supplementary_Materials/Sample_Painting.mp4
- Supplementary_Materials/Sound2Sight_Generated_Drums_Clips/
- Supplementary_Materials/Sound2Sight_Generated_Drums_Clips/test_201.avi
- Supplementary_Materials/Sound2Sight_Generated_Drums_Clips/test_262.avi
- Supplementary_Materials/Sound2Sight_Generated_Drums_Clips/test_550.avi
- Supplementary_Materials/Sound2Sight_Generated_Drums_Clips/test_782.avi
- Supplementary_Materials/Sound2Sight_Generated_Drums_Clips/test_83.avi
- Supplementary_Materials/Sound2Sight_Generated_M3SO_Clips/
- Supplementary_Materials/Sound2Sight_Generated_M3SO_Clips/test_136.avi
- Supplementary_Materials/Sound2Sight_Generated_M3SO_Clips/test_162.avi
- Supplementary_Materials/Sound2Sight_Generated_M3SO_Clips/test_619.avi
- Supplementary_Materials/Sound2Sight_Generated_M3SO_Clips/test_732.avi
- Supplementary_Materials/Sound2Sight_Generated_M3SO_Clips/test_765.avi
- Supplementary_Materials/Sound2Sight_Generated_Painting_Clips/
- Supplementary_Materials/Sound2Sight_Generated_Painting_Clips/test_170.avi
- Supplementary_Materials/Sound2Sight_Generated_Painting_Clips/test_325.avi
- Supplementary_Materials/Sound2Sight_Generated_Painting_Clips/test_351.avi
- Supplementary_Materials/Sound2Sight_Generated_Painting_Clips/test_416.avi
- Supplementary_Materials/Sound2Sight_Generated_Painting_Clips/test_97.avi
- Supplementary_Materials/Sound2Sight_Supplement.pdf
- Supplementary_Materials/Synchronized_Video_Final.mp4
